# Supplementary material for: Effect of Microwave Vacuum Puffing Conditions on the Dielectric Properties of Berries
Source: Research Square preprint supplement (doi:10.21203/rs.3.rs-5868892/v1), 2025-05-02
Supplement: Supplementary file 1 [file 47a63e9dba0cb6e3e86692dc.docx]

**Table 1.** Instrument and Equipment

| Instrument and Equipment | Model | Manufacturer |
| --- | --- | --- |
| Microwave vacuum drying equipment(modified) | QW-4HV | Guangzhou Kewei Microwave Energy Co., Ltd. China |
| Microwave oven | LG-WD700 | Tianjin LG Electronics & Appliances Co., Ltd. China. |
| Electronic precision balance | ARRW60 (Accuracy: 0.01 g) | Ohaus (Shanghai) Corporation. China |
| Philips blender | HR1727 | Philips Domestic Appliances Co., Ltd. |
| Forced - air drying oven | DHG-9053A | Shanghai Yiheng Experimental Instrument Co., Ltd. CHina |
| Oscillator | 16700 | Thermolyne Corporation，America. |
| Fiber optic temperature sensor | PIM | Photon Control Inc. Canada. |
| Thermal property analyzer | KD2：SH-1 | Meter Group. America |

**Table 2.** Factors and levels coding

| **Code** | **Factors** | | | |
| --- | --- | --- | --- | --- |
| ***A*:Processing amount /g** | ***B*:Initial moisture content /%** | ***C:Puffing time /s*** | ***D:Vacuum pressure***  ***/kPa*** |
| -2 | 48 | 18 | 80 | 40 |
| -1 | 72 | 20 | 90 | 50 |
| 0 | 96 | 22 | 100 | 60 |
| 1 | 120 | 24 | 110 | 70 |
| 2 | 144 | 26 | 120 | 80 |

**Table 3.** Experimental scheme and results

| No. | *A*:Processing amount/g | *B*:Initial  moisture  content /% | *C*:Puffing time /s | *D*:Vacuum pressure  /kPa | Ɛ’: Dielectric  Constant | Ɛ’’: Dielectric loss factor |
| --- | --- | --- | --- | --- | --- | --- |
| 1 | 96 | 18 | 100 | 60 | 93.35 | 0.0511 |
| 2 | 96 | 22 | 100 | 60 | 47.52 | 0.0671 |
| 3 | 96 | 22 | 100 | 60 | 40.62 | 0.0712 |
| 4 | 96 | 22 | 100 | 60 | 11.55 | 0.0600 |
| 5 | 96 | 22 | 100 | 60 | 56.01 | 0.0629 |
| 6 | 96 | 22 | 100 | 60 | 56.07 | 0.0629 |
| 7 | 96 | 22 | 100 | 40 | 52.80 | 0.0644 |
| 8 | 72 | 20 | 110 | 70 | 66.94 | 0.0586 |
| 9 | 72 | 20 | 90 | 70 | 108.04 | 0.0481 |
| 10 | 96 | 22 | 100 | 60 | 46.07 | 0.0679 |
| 11 | 120 | 24 | 90 | 50 | 69.30 | 0.0578 |
| 12 | 120 | 20 | 90 | 50 | 89.46 | 0.0520 |
| 13 | 72 | 24 | 110 | 70 | 21.11 | 0.0905 |
| 14 | 120 | 20 | 110 | 50 | 46.98 | 0.0674 |
| 15 | 96 | 22 | 120 | 60 | 37.63 | 0.0733 |
| 16 | 120 | 24 | 110 | 50 | 27.45 | 0.0824 |
| 17 | 96 | 22 | 100 | 80 | 30.09 | 0.0797 |
| 18 | 96 | 26 | 100 | 60 | 23.57 | 0.0870 |
| 19 | 96 | 22 | 100 | 60 | 27.98 | 0.0818 |
| 20 | 96 | 22 | 100 | 60 | 43.03 | 0.0697 |
| 21 | 96 | 22 | 100 | 60 | 32.47 | 0.0775 |
| 22 | 72 | 20 | 90 | 50 | 81.85 | 0.0540 |
| 23 | 48 | 22 | 100 | 60 | 60.19 | 0.0611 |
| 24 | 120 | 20 | 90 | 70 | 60.89 | 0.0608 |
| 25 | 72 | 24 | 110 | 50 | 100.67 | 0.0495 |
| 26 | 120 | 24 | 90 | 70 | 44.57 | 0.0687 |
| 27 | 96 | 22 | 100 | 60 | 38.82 | 0.0725 |
| 28 | 72 | 24 | 90 | 50 | 22.90 | 0.0879 |
| 29 | 96 | 22 | 80 | 60 | 56.31 | 0.0628 |
| 30 | 144 | 22 | 100 | 60 | 59.14 | 0.0615 |
| 31 | 96 | 22 | 100 | 60 | 21.09 | 0.0905 |
| 32 | 72 | 20 | 110 | 50 | 78.55 | 0.0549 |
| 33 | 96 | 22 | 100 | 60 | 52.62 | 0.0644 |
| 34 | 72 | 24 | 90 | 70 | 46.66 | 0.0675 |
| 35 | 120 | 24 | 110 | 70 | 27.96 | 0.0819 |
| 36 | 120 | 20 | 110 | 70 | 49.39 | 0.0661 |

**Table 4.** Analysis of variance for dielectric constant

| Source | Sum of squares | Degrees of freedom | Mean square | *F value* | *P > F* |  |
| --- | --- | --- | --- | --- | --- | --- |
| Model | 12829.9107 | 14 | 916.4222 | 2.8759 | 0.0141 | * |
| *A*:Processing amount | 530.2296 | 1 | 530.2296 | 1.6640 | 0.2111 |  |
| *B*:Initial moisture content | 5431.6362 | 1 | 5431.6362 | 17.0457 | 0.0005 | ** |
| *C*:Puffing time | 839.7857 | 1 | 839.7857 | 2.6354 | 0.1194 |  |
| *D*:Vacuum pressure | 781.9070 | 1 | 781.9070 | 2.4538 | 0.1322 |  |
| *AB* | 277.1792 | 1 | 277.1792 | 0.8699 | 0.3616 |  |
| *AC* | 903.5224 | 1 | 903.5224 | 2.8355 | 0.1070 |  |
| *AD* | 5.2455 | 1 | 5.2455 | 0.0165 | 0.8991 |  |
| *BC* | 530.6504 | 1 | 530.6504 | 1.6653 | 0.2109 |  |
| *BD* | 292.7726 | 1 | 292.7726 | 0.9188 | 0.3487 |  |
| *CD* | 450.5325 | 1 | 450.5325 | 1.4139 | 0.2477 |  |
| *A2* | 1253.3823 | 1 | 1253.3823 | 3.9334 | 0.0606 |  |
| *B2* | 1135.7950 | 1 | 1135.7950 | 3.5644 | 0.0729 |  |
| *C2* | 304.4303 | 1 | 304.4303 | 0.9554 | 0.3395 |  |
| *D2* | 92.8421 | 1 | 92.8421 | 0.2914 | 0.5950 |  |
| Residual error | 6691.6625 | 21 | 318.6506 |  |  |  |
| Lack of fit | 4548.7854 | 10 | 454.8785 | 2.3350 | 0.0902 | non-significant |
| Pure error | 2142.8770 | 11 | 194.8070 |  |  |  |
| Total | 19521.5731 | 35 |  |  |  |  |

Notes：**Extremely significant（*P* <0.01）； *Significant（*P* <0.05）

**Table 5.** Analysis of variance for dielectric loss factor

| Source | Sum of squares | Degrees of freedom | Mean square | *F value* | *P > F* |  |
| --- | --- | --- | --- | --- | --- | --- |
| Model | 0.0029 | 14.0000 | 0.0002 | 2.2162 | 0.0482 | * |
| *A*:Processing amount | 0.0000 | 1.0000 | 0.0000 | 0.3267 | 0.5737 |  |
| *B*:Initial moisture content | 0.0016 | 1.0000 | 0.0016 | 17.3595 | 0.0004 | ** |
| *C:Puffing time* | 0.0002 | 1.0000 | 0.0002 | 2.5732 | 0.1236 |  |
| *D:Vacuum pressure* | 0.0002 | 1.0000 | 0.0002 | 2.0204 | 0.1699 |  |
| *AB* | 0.0001 | 1.0000 | 0.0001 | 0.8438 | 0.3688 |  |
| *AC* | 0.0002 | 1.0000 | 0.0002 | 2.6450 | 0.1188 |  |
| *AD* | 0.0000 | 1.0000 | 0.0000 | 0.0002 | 0.9897 |  |
| *BC* | 0.0000 | 1.0000 | 0.0000 | 0.0637 | 0.8032 |  |
| *BD* | 0.0000 | 1.0000 | 0.0000 | 0.4472 | 0.5109 |  |
| *CD* | 0.0002 | 1.0000 | 0.0002 | 1.6591 | 0.2117 |  |
| *A2* | 0.0002 | 1.0000 | 0.0002 | 2.5293 | 0.1267 |  |
| *B2* | 0.0000 | 1.0000 | 0.0000 | 0.2021 | 0.6576 |  |
| *C2* | 0.0000 | 1.0000 | 0.0000 | 0.3561 | 0.5570 |  |
| *D2* | 0.0000 | 1.0000 | 0.0000 | 0.0001 | 0.9937 |  |
| Residual error | 0.0019 | 21.0000 | 0.0001 |  |  |  |
| Lack of fit | 0.0011 | 10.0000 | 0.0001 | 1.3717 | 0.3052 | non-significant |
| Pure error | 0.0009 | 11.0000 | 0.0001 |  |  |  |
| Total | 0.0048 | 35.0000 |  |  |  |  |

Notes：**Extremely significant（*P* <0.01）； *Significant（*P* <0.05）
